# Supplementary material
Source: publisher site journal article supplement (https://www.spandidos-publications.com/1376/downloadSupplementary)

Figure S1. XPD expression in ESCC and adjacent normal esophageal tissues. The expression levels of XPD protein in ESCC tissue samples (T6-T20) and adjacent normal esophageal tissue samples (N6-N20) were detected by western blot analysis. ESCC, esophageal squamous cell carcinoma; XPD, xeroderma pigmentosum complementation group D; Adjacent NE, adjacent normal esophagus.

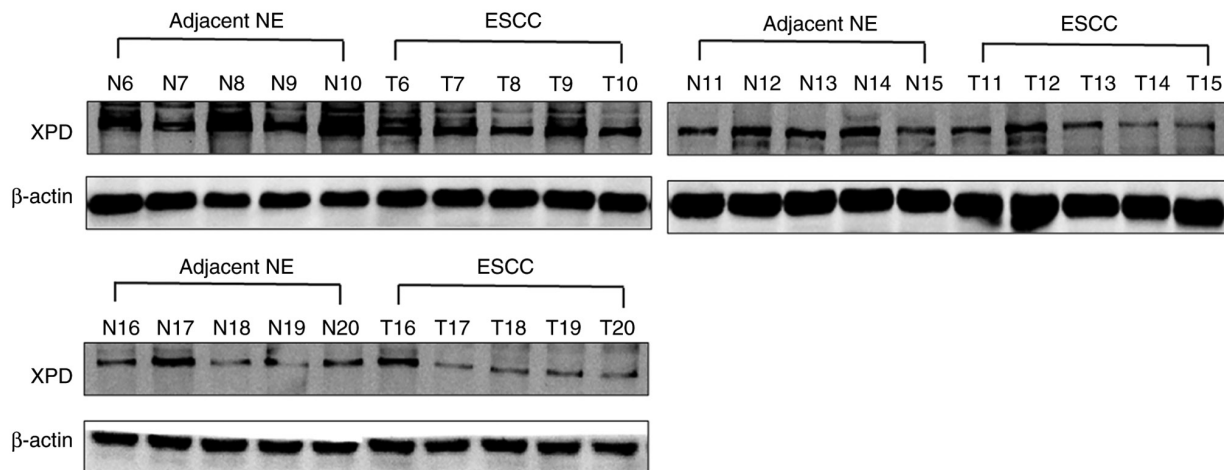

Supplement: Supplementary file 1 [file downloadSupplementary]
